# Supplementary material for: Machine Learning for Predicting Risk of Early Dropout in a Recovery Program for Opioid Use Disorder
Source: MDPI journal article supplement (doi:10.3390/healthcare10020223), 2022-01-25
Supplement: s1 [file s1]

**Table S1:** Factors significantly associated with early dropout. Factors are ordered by p-value for the association at 90 days.

1

| Description                                                           | Adjusted p-value 90d | Adjusted p-value 120d | Model weight 90d | Model weight 120d |
|-----------------------------------------------------------------------|----------------------|-----------------------|------------------|-------------------|
| Quality of life improvement                                           | 4.E-15               | 4.E-25                | 0.64             | 0.88              |
| Have relapsed since joining the program                               | 3.E-06               | 2.E-11                | 0.37             | 0.67              |
| Have used prescription oxycodone                                      | 5.E-05               | 3.E-04                | 0.36             | 0.22              |
| Past legal problems                                                   | 6.E-05               | 8.E-05                | 0.24             | 0.13              |
| Substance use history of benzodiazepines                              | 1.E-04               | 3.E-05                | 0.28             | 0.11              |
| Are you a veteran?                                                    | 1.E-04               | 8.E-06                | 0.18             | 0.27              |
| Female                                                                | 7.E-04               | 1.E-05                | 0.19             | 0.33              |
| First time taking medications for opioid use disorder                 | 1.E-03               | 6.E-03                | 0.18             | 0.32              |
| Housing status: Other                                                 | 2.E-03               | 4.E-06                | 0.30             | 0.53              |
| Prior use of barbiturates                                             | 3.E-03               | 2.E-04                | 0.16             | 0.12              |
| Substance use history of hallucinogens                                | 8.E-03               | 4.E-06                | 0.13             | 0.21              |
| Substance use history of non Rx opiates                               | 1.E-02               | 4.E-05                | 0.15             | 0.19              |
| Substance use history of cocaine                                      | 1.E-02               | 1.E-05                | 0.11             | 0.20              |
| Prior use of non Rx suboxone                                          | 2.E-02               | 2.E-03                | 0.08             | 0.10              |
| Taken medications for opioid use disorder from inpatient services     | 2.E-02               | 1.E-02                | 0.14             | 0.14              |
| Substance use history of alcohol                                      | 2.E-02               | 6.E-05                | 0.11             | 0.16              |
| Prior use of cocaine                                                  | 2.E-02               | 2.E-05                | 0.08             | 0.18              |
| Housing status: Homeless                                              | 2.E-02               | 4.E-03                | 0.37             | 0.29              |
| Substance use history of Marijuana                                    | 2.E-02               | 4.E-05                | 0.13             | 0.13              |
| Prior use of nicotine or tobacco                                      | 2.E-02               | 3.E-05                | 0.12             | 0.14              |
| Drug of choice? (choice=Other substances)                             | 2.E-02               | 7.E-03                | 0.04             | 0.00              |
| Prior arrest for drug charges                                         | 2.E-02               | 9.E-03                | 0.02             | 0.09              |
| Consider themselves as neither religious nor spiritual                | 2.E-02               | 4.E-02                | 0.07             | -0.02             |
| Substance use history of heroin                                       | 2.E-02               | 2.E-04                | 0.04             | 0.11              |
| Prior arrest for parole or probation violations                       | 2.E-02               | 3.E-02                | 0.03             | 0.06              |
| Ever taken medications for opioid use disorder in outpatient services | 4.E-02               | 1.E-05                | 0.23             | 0.39              |
| Consider yourself to be spiritual                                     | 4.E-02               | 1.E-04                | 0.06             | 0.15              |

2

3

4
